# Supplementary material for: Kinetic studies of atmospherically relevant silicon chemistry. Part II: Silicon monoxide reactions
Source: Royal Society of Chemistry journal article supplement (doi:10.1039/b911745h), 2009-01-01
Supplement: b911745h.pdf [file b911745h.pdf]

Table S1. Calculated molecular parameters (B3LYP/6-311+G(2d,p)) and heats of formation (CBS-Q)  
 of stationary points on the OH + SiO potential energy surface.<sup>a</sup>

| Species                                                | Geometry <sup>b</sup>                 | Dipole moment <sup>c</sup> | Rotational constants <sup>d</sup> | Vibrational frequencies <sup>e</sup> | $\Delta H_f^\circ(0\text{ K})$ <sup>f</sup> |
|--------------------------------------------------------|---------------------------------------|----------------------------|-----------------------------------|--------------------------------------|---------------------------------------------|
| HOSiO- <i>cis</i> ( <sup>2</sup> A')<br>planar $C_s$   | $r(\text{H-O})=0.968$                 | 2.696                      | 55.69                             | 278 (a')                             | -324.0                                      |
|                                                        | $r(\text{O-Si})=1.639$                |                            | 7.575                             | 390 (a'')                            |                                             |
|                                                        | $r(\text{Si-O})=1.534$                |                            | 6.668                             | 763 (a')                             |                                             |
|                                                        | $\angle(\text{H-O-Si})=117.43^\circ$  |                            |                                   | 864 (a')                             |                                             |
|                                                        | $\angle(\text{O-Si-O})=126.79^\circ$  |                            |                                   | 1161 (a')                            |                                             |
| TS1 ( <sup>2</sup> A)<br>$C_1$                         | $r(\text{H-O})= 0.964$                | 4.018                      | 63.89                             | -386 (a)                             | -311.7                                      |
|                                                        | $r(\text{O-Si})= 1.640$               |                            | 7.252                             | 299 (a)                              |                                             |
|                                                        | $r(\text{Si-O})= 1.537$               |                            | 6.611                             | 615 (a)                              |                                             |
|                                                        | $\angle(\text{H-O-Si})= 124.08^\circ$ |                            |                                   | 829 (a)                              |                                             |
|                                                        | $\angle(\text{O-Si-O})= 128.34^\circ$ |                            |                                   | 1178 (a)                             |                                             |
|                                                        | $\angle(\text{H-OSiO})= 93.17^\circ$  |                            |                                   | 3853 (a)                             |                                             |
| HOSiO- <i>trans</i> ( <sup>2</sup> A')<br>planar $C_s$ | $r(\text{H-O})= 0.965$                | 4.745                      | 62.09                             | 294 (a')                             | -323.6                                      |
|                                                        | $r(\text{O-Si})= 1.645$               |                            | 7.412                             | 359 (a'')                            |                                             |
|                                                        | $r(\text{Si-O})= 1.530$               |                            | 6.621                             | 783 (a')                             |                                             |
|                                                        | $\angle(\text{H-O-Si})= 118.19^\circ$ |                            |                                   | 824 (a')                             |                                             |
|                                                        | $\angle(\text{O-Si-O})= 124.62^\circ$ |                            |                                   | 1178 (a')                            |                                             |
|                                                        |                                       |                            | 3842 (a')                         |                                      |                                             |

Supplementary Material (ESI) for *PCCP*  
 This journal is © the Owner Societies 2009

|                                                   |                                       |       |       |                         |                   |        |                   |
|---------------------------------------------------|---------------------------------------|-------|-------|-------------------------|-------------------|--------|-------------------|
| TS2 ( <sup>2</sup> A')                            | $r(\text{H-O})= 1.470$                | 2.234 | 134.0 | -1255                   | (a')              | -134.4 |                   |
|                                                   | planar $C_s$                          |       |       | $r(\text{O-Si})= 1.590$ | 299               |        | (a')              |
|                                                   | $r(\text{Si-O})= 1.514$               |       |       | 333                     | (a'')             |        |                   |
|                                                   | $\angle(\text{H-O-Si})= 62.76^\circ$  |       |       | 882                     | (a')              |        |                   |
|                                                   | $\angle(\text{H-Si-O})= 153.41^\circ$ |       |       | 1287                    | (a')              |        |                   |
|                                                   |                                       |       |       | 1825                    | (a')              |        |                   |
| HSiO <sub>2</sub> ( <sup>2</sup> B <sub>2</sub> ) | $r(\text{H-Si})= 1.468$               | 3.352 | 36.23 | 307                     | (a <sub>1</sub> ) | -174.0 |                   |
|                                                   | planar $C_{2v}$                       |       |       | $r(\text{Si-O})= 1.565$ | 546               |        | (b <sub>2</sub> ) |
|                                                   | $\angle(\text{O-Si-O})= 115.81^\circ$ |       |       | 573                     | (b <sub>1</sub> ) |        |                   |
|                                                   |                                       |       |       | 912                     | (b <sub>2</sub> ) |        |                   |
|                                                   |                                       |       |       | 1020                    | (a <sub>1</sub> ) |        |                   |
|                                                   |                                       |       |       | 2298                    | (a <sub>1</sub> ) |        |                   |
| TS3 ( <sup>2</sup> A')                            | $r(\text{H-O})= 1.882$                | 0.315 | 299.9 | -596                    | (a')              | -49.1  |                   |
|                                                   | planar $C_s$                          |       |       | $r(\text{O-Si})= 1.523$ | 83                |        | (a')              |
|                                                   | $r(\text{Si-O})= 1.513$               |       |       | 293                     | (a'')             |        |                   |
|                                                   | $\angle(\text{H-O-Si})= 137.41^\circ$ |       |       | 298                     | (a')              |        |                   |
|                                                   | $\angle(\text{O-Si-O})= 175.53^\circ$ |       |       | 955                     | (a')              |        |                   |
|                                                   |                                       |       |       | 1402                    | (a')              |        |                   |
| HSiOO ( <sup>2</sup> A')                          | $r(\text{H-Si})= 1.518$               | 2.273 | 90.86 | 249                     | (a')              | 193.0  |                   |
|                                                   | planar $C_s$                          |       |       | $r(\text{Si-O})= 1.692$ | 253               |        | (a'')             |
|                                                   | $r(\text{O-O})= 1.319$                |       |       | 643                     | (a')              |        |                   |
|                                                   | $\angle(\text{H-Si-O})= 89.63^\circ$  |       |       | 824                     | (a')              |        |                   |
|                                                   | $\angle(\text{Si-O-O})= 133.5^\circ$  |       |       | 1156                    | (a')              |        |                   |
|                                                   |                                       |       |       | 2053                    | (a')              |        |                   |

|                |                                       |       |       |           |       |
|----------------|---------------------------------------|-------|-------|-----------|-------|
| TS4 ( $^2A'$ ) | $r(\text{H-Si}) = 1.524$              | 2.403 | 37.85 | -357 (a') | 200.2 |
| planar $C_s$   | $r(\text{Si-O}) = 1.675$              |       | 8.536 | 602 (a'') |       |
|                | $r(\text{O-O}) = 1.427$               |       | 6.965 | 692 (a')  |       |
|                | $\angle(\text{H-Si-O}) = 91.85^\circ$ |       |       | 798 (a')  |       |
|                | $\angle(\text{Si-O-O}) = 93.60^\circ$ |       |       | 922 (a')  |       |
|                |                                       |       |       | 1992 (a') |       |

---

<sup>a</sup> The molecular parameters at the B3LYP/6-311+G(2d,p) level of theory and heats of formation at the CBS-Q level of theory for SiO, SiO<sub>2</sub>, SiH, SiH<sub>2</sub>( $^1A_1$ ) and SiC were benchmarked against experimental data in the ESI of Part I of this series.<sup>1</sup> The accuracy of the *ab initio* results is stated following the convention of the CCCBDB-NIST database.<sup>2</sup> This is also broadly consistent with the accuracy of the experimental data reported for the silicon benchmarking species.<sup>1</sup> <sup>b</sup> Geometrical parameters:  $r$  in Å and  $\angle$  in degrees. <sup>c</sup> In Debye (=  $3.336 \times 10^{-30}$  Cm). <sup>d</sup> In GHz. <sup>e</sup> In  $\text{cm}^{-1}$ . The symmetry of the vibration is shown in parenthesis. <sup>f</sup> In  $\text{kJ mol}^{-1}$ . Evaluated uncertainty =  $\pm 7 \text{ kJ mol}^{-1}$ .<sup>3</sup> The heats of formation at 0 K of the corresponding atomic species are: Si( $^3P$ ),  $446 \pm 8 \text{ kJ mol}^{-1}$ ; O( $^3P$ ),  $246.98 \pm 0.08 \text{ kJ mol}^{-1}$ ; and H( $^2S$ ),  $216.164 \pm 0.004 \text{ kJ mol}^{-1}$ .<sup>4</sup>

#### References:

- 1 J. C. Gómez Martín, M. A. Blitz and J. M. C. Plane, *Phys. Chem. Chem. Phys.*, 2009, **11**, 671-678.
- 2 NIST, Computational Chemistry Comparison and Benchmark DataBase Release 14, NIST Standard Reference Database 101, 2006, <http://srdata.nist.gov/cccbdb>
- 3 L. A. Curtiss, K. Raghavachari, P. C. Redfern and B. B. Stefanov, *J. Chem. Phys.*, 1998, **108**, 692-697.
- 4 L. A. Curtiss, K. Raghavachari, P. C. Redfern and J. A. Pople, *J. Chem. Phys.*, 1997, **106**, 1063-1079.

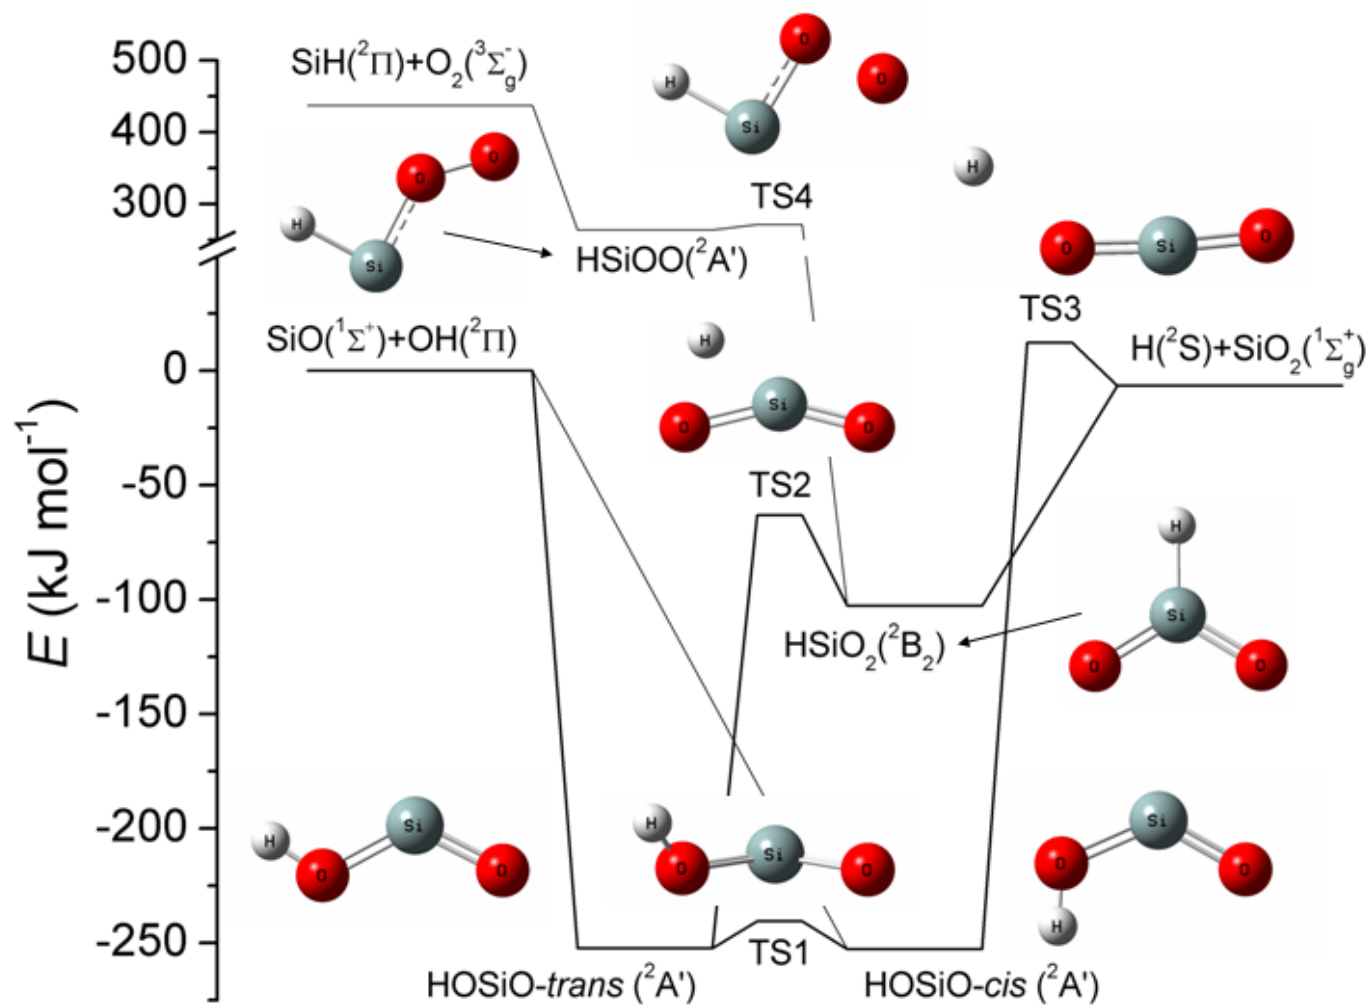

Figure S1. Stationary points on the SiO + OH potential surface, using the data in Table S1.

Table 2. Calculated molecular parameters (B3LYP/6-311+G(2d,p)) and heats of formation (CBS-Q)  
 for stationary points on the SiO + H<sub>2</sub>O potential energy surface

| Species                                | Geometry                              | Dipole moment | Rotational constants | Vibrational frequencies | $\Delta H_f^\circ(0\text{ K})^a$ |
|----------------------------------------|---------------------------------------|---------------|----------------------|-------------------------|----------------------------------|
| TS5 ( <sup>1</sup> A)                  | $r(\text{H-O})= 0.967$                | 2.996         | 19.23                | -1358 (a)               | -330.8                           |
| $C_1$                                  | $r(\text{O-Si})=1.966$                |               | 10.11                | 418 (a)                 |                                  |
|                                        | $r(\text{Si-O})=1.583$                |               | 6.712                | 474 (a)                 |                                  |
|                                        | $r(\text{O-H})= 1.343$                |               |                      | 692 (a)                 |                                  |
|                                        | $\angle(\text{H-O-Si})= 123.87^\circ$ |               |                      | 696 (a)                 |                                  |
|                                        | $\angle(\text{O-Si-O})= 79.43^\circ$  |               |                      | 1064 (a)                |                                  |
|                                        | $\angle(\text{Si-O-H})= 80.16^\circ$  |               |                      | 1315 (a)                |                                  |
|                                        | $\angle(\text{H-OSiO})=-113.1^\circ$  |               |                      | 1912 (a)                |                                  |
|                                        |                                       |               |                      | 3800 (a)                |                                  |
| Si(OH) <sub>2</sub> ( <sup>1</sup> A') | $r(\text{H-O})= 0.967$                | 1.826         | 26.08                | 321 (a')                | -498.3                           |
| planar $C_s$                           | $r(\text{O-Si})=1.652$                |               | 8.834                | 443 (a'')               |                                  |
|                                        | $r(\text{Si-O})=1.675$                |               | 6.599                | 515 (a'')               |                                  |
|                                        | $r(\text{O-H})= 0.963$                |               |                      | 778 (a')                |                                  |
|                                        | $\angle(\text{H-O-Si})=117.4^\circ$   |               |                      | 797 (a')                |                                  |
|                                        | $\angle(\text{O-Si-O})=126.8^\circ$   |               |                      | 832 (a')                |                                  |
|                                        | $\angle(\text{Si-O-H})=116.9^\circ$   |               |                      | 893 (a')                |                                  |
|                                        |                                       |               |                      | 3794 (a')               |                                  |
|                                        |                                       |               | 3859 (a')            |                         |                                  |

<sup>a</sup> Units as indicated in the footnote to Table S1.

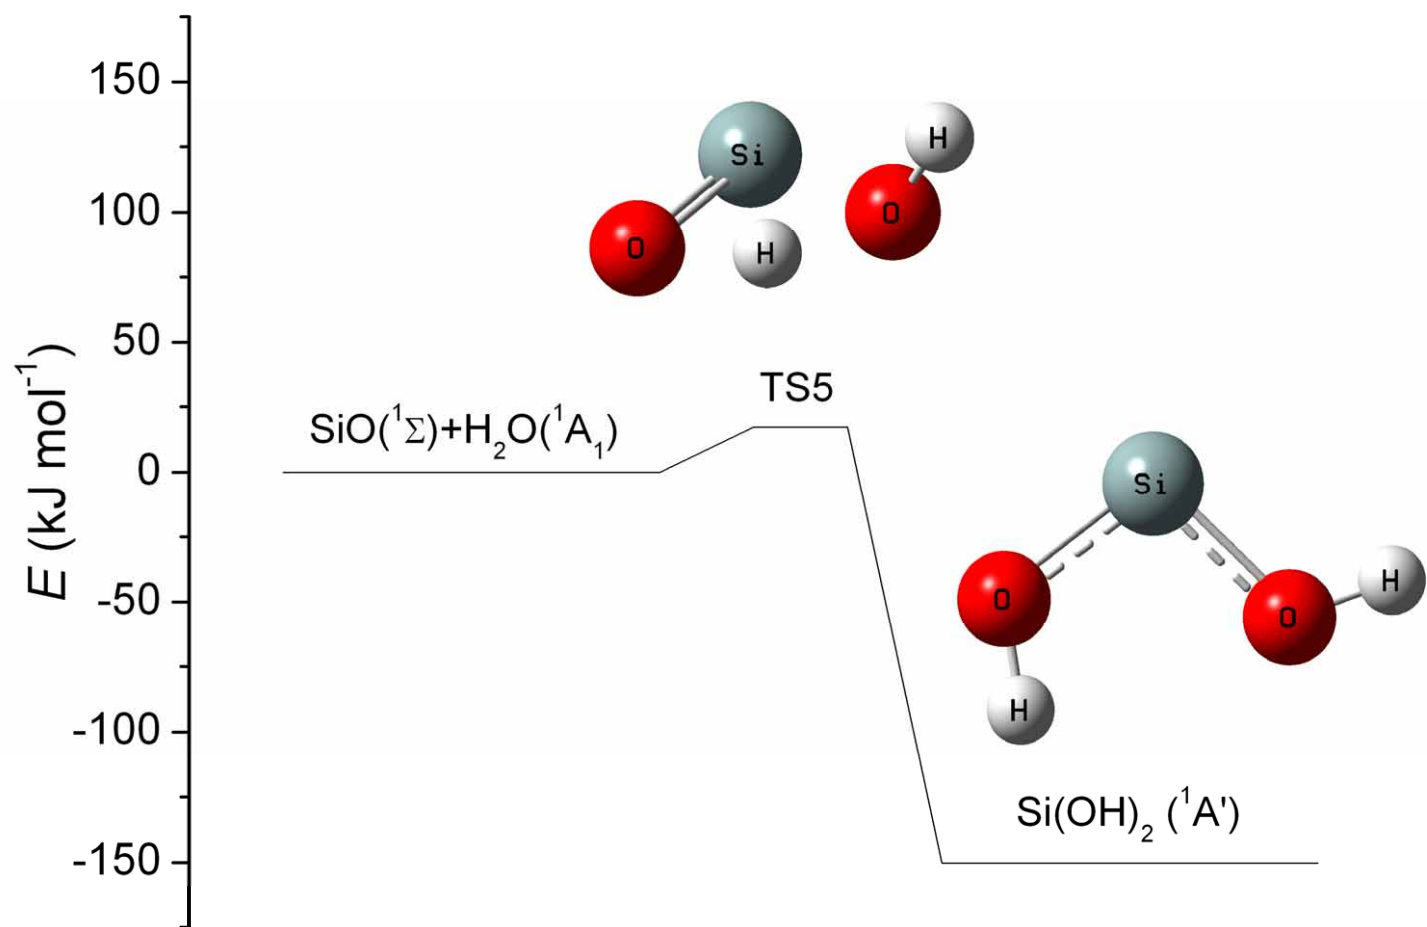

**Figure S2.** Stationary points on the SiO + H<sub>2</sub>O potential surface, using the data in Table S2.

Table S3. Calculated molecular parameters (B3LYP/6-311+G(2d,p)) and heats of formation (CBS-Q) of stationary points on the SiO<sub>2</sub> + O potential energy surface

| Species                 | Geometry                              | Dipole moment | Rotational constants | Vibrational frequencies | $\Delta H_f^0(0\text{ K})^a$ |
|-------------------------|---------------------------------------|---------------|----------------------|-------------------------|------------------------------|
| TS6 ( <sup>3</sup> A'') | $r(\text{O-O})= 1.702$                | 1.760         | 21.960               | -773 (a')               | 57.6                         |
|                         | $r(\text{O-Si})= 1.591$               |               | 3.545                | 111 (a')                |                              |
|                         | $r(\text{Si-O})= 1.518$               |               | 3.052                | 225 (a'')               |                              |
|                         | $\angle(\text{O-O-Si})= 118.89^\circ$ |               |                      | 324 (a')                |                              |
|                         | $\angle(\text{O-Si-O})= 151.76^\circ$ |               |                      | 787 (a')                |                              |
| TS7 ( <sup>3</sup> A)   | $r(\text{O-O})= 1.348$                | 2.305         | 28.769               | 1265 (a')               | -18.8                        |
|                         | $r(\text{O-Si})= 1.756$               |               | 3.788                | -160 (a)                |                              |
|                         | $r(\text{Si-O})= 1.529$               |               | 3.669                | 78 (a)                  |                              |
|                         | $\angle(\text{O-O-Si})= 100.6^\circ$  |               |                      | 252 (a)                 |                              |
|                         | $\angle(\text{O-Si-O})= 120.8^\circ$  |               |                      | 624 (a)                 |                              |
|                         | $\angle(\text{OOSi-O})= 126.1^\circ$  |               |                      | 1092 (a)                |                              |
| TS8 ( <sup>1</sup> A)   | $r(\text{O-O})= 1.391$                | 2.853         | 24.568               | 1154 (a)                | -7.1                         |
|                         | $r(\text{O-Si})= 1.664$               |               | 4.074                | -317 (a)                |                              |
|                         | $r(\text{Si-O})= 1.519$               |               | 3.610                | 99 (a)                  |                              |
|                         | $\angle(\text{O-O-Si})= 104.5^\circ$  |               |                      | 165 (a)                 |                              |
|                         | $\angle(\text{O-Si-O})= 143.1^\circ$  |               |                      | 634 (a)                 |                              |
|                         | $\angle(\text{OOSi-O})= -70.96^\circ$ |               |                      | 913 (a)                 |                              |
|                         |                                       |               | 1229 (a)             |                         |                              |

|                                                   |                                      |       |        |      |                   |        |
|---------------------------------------------------|--------------------------------------|-------|--------|------|-------------------|--------|
| OSiO <sub>2</sub> ( <sup>3</sup> B <sub>1</sub> ) | $r(\text{O-Si})= 1.511$              | 1.556 | 13.180 | 258  | (a <sub>1</sub> ) | -201.8 |
| C <sub>2v</sub>                                   | $r(\text{O-Si})= 1.632$              |       | 6.269  | 282  | (b <sub>2</sub> ) |        |
|                                                   | $\angle(\text{O-Si-O})= 137.9^\circ$ |       | 4.249  | 288  | (b <sub>1</sub> ) |        |
|                                                   |                                      |       |        | 843  | (a <sub>1</sub> ) |        |
|                                                   |                                      |       |        | 918  | (b <sub>2</sub> ) |        |
|                                                   |                                      |       |        | 1301 | (a <sub>1</sub> ) |        |

---

<sup>a</sup> Units as indicated in the footnote to Table S1.



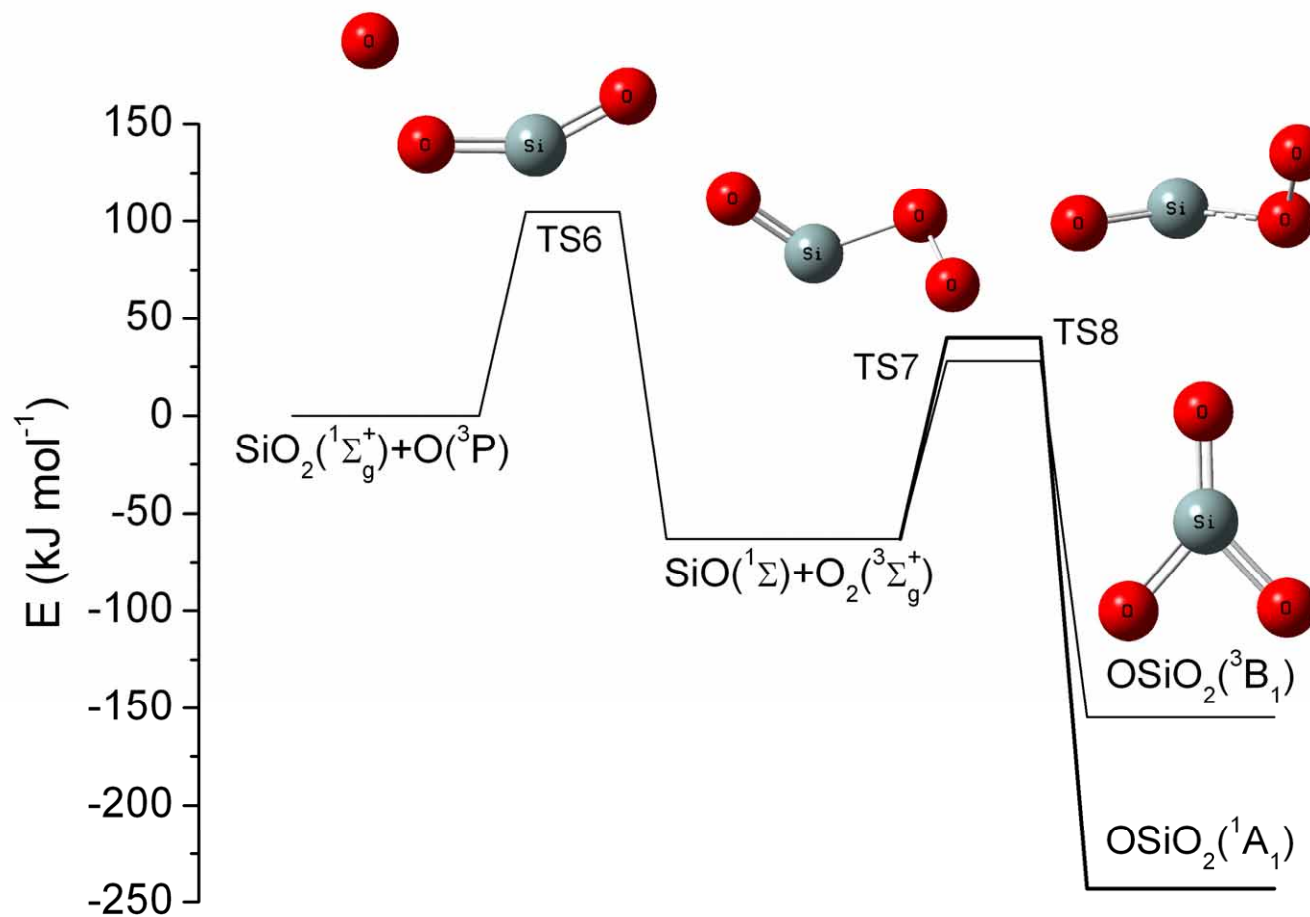

**Figure S4.** Stationary points on the SiO<sub>2</sub> + O potential surface, using the data in Table S3.

Supplementary Material (ESI) for *PCCP*  
This journal is © the Owner Societies 2009
